# Supplementary material
Source: PubMed Central journal article supplement (PMC1283798)
Supplement: pnas_0504997102_3.pdf [file pnas_0504997102_3.pdf]

MICAL1\_MOUSE  $\alpha 1$   $\alpha 2$   $\alpha 3$   $\alpha 4$   $\beta 1$   $\alpha 5$

1 10 20 30 40 50 60 70 80 90 100

MICAL1\_MOUSE .MASPASTNPAHDHFTPTFVAQLCQDVVSSFGGLCRALGVESGGGLDSCWKTKAQLNYSWAKSLWALDERRASQPVYQGGQA CTNKKCLVVGAGPCGLRAVELAILLGA  
MICAL1\_HUMAN .MASPSTTNPAAAHFESFLQALCQDVVSSFGGLCGALGLGEPGGGLDLPQHKIKDQLNYSWAKSLWALDERRAGQPVYQGGRACTSTKCLVVGAGPCGLRAVELAILLGA  
MICAL2\_MOUSE MGENEDFKQAQAGQVFNPFVQATTCCKGTLQAFNLTCLLDLPLDHHNFFSQLSKLSKVTTWRKALWVALDERRGSHKDYRKGKACTMTCGLVGGGPCGLRAIELAYLGA  
MICAL2\_HUMAN MGENEDFKQAQAGQVFNPFVQATTCCKGTLQAFNLTTRHLDLPLDHHNFFSKLKSQVTTWRKALWVALDERRGSHKDYRKGKACTMTCGLVGGGPCGLRAIELAYLGA  
MICAL3\_MOUSE MBERKQETTPNAHVLPDRFVQATTCCKGTLRAFQELCDHLELKKPKDHYSEYHKLKSQVTTWRKALWVALDERRGSHKDYRKGKACTMTCGLVGGGPCGLRAIELAYLGA  
MICAL3\_HUMAN MBERKQETTPNAHVLPDRFVQATTCCKGTLRAFQELCDHLELKKPKDHYSEYHKLKSQVTTWRKALWVALDERRGSHKDYRKGKACTMTCGLVGGGPCGLRAIELAYLGA  
MICAL\_DROME .MAEHA AAAEAELEPDLLCVATTMROTLALHRAAMCEAVGLRPSPLNDFEWRPLKAKVRSWRKALWVALDERRAAHRVYGRGAACCTCTRVLVVGGGPCGLRAIEAQLLGA

MICAL1\_MOUSE  $\beta 2$   $\beta 3$   $\alpha 6$   $\alpha 7$   $\beta 4$   $\alpha 8$   $\beta 5$   $\beta 6$   $\beta 7$   $\alpha 9$   $\beta 8$

110 120 130 140 150 160 170 180 190 200 210

MICAL1\_MOUSE RVVLEVKRIRKFSRHNVLHLWPFPIIDLRALGAKKFFYGRFCGTLIDHSIRQLQLLLEKVALLGVESHVHWGKFTFGLQPPPRKGS...GWRAOLQPNPPAQLASVYEFQDVL  
MICAL1\_HUMAN RVVLEVKRIRKFSRHNVLHLWPFPIIDLRALGAKKFFYGRFCGTLIDHSIRQLQLLLEKVALLGVESHVHWGKFTFGLQPPPRKGS...GWRAOLQPNPPAQLASVYEFQDVL  
MICAL2\_MOUSE RVVVVEKRIKFSRHNVLHLWPFPIIDLRALGAKKFFYGRFCGTLIDHSIRQLQLLLEKVALLGVESHVHNVEFPFVRLVLEPPPEQDQNGKRWRAEFIPADHA LSFDFEFDVL  
MICAL2\_HUMAN RVVVVEKRIKFSRHNVLHLWPFPIIDLRALGAKKFFYGRFCGTLIDHSIRQLQLLLEKVALLGVESHVHNVEFPFVRLVLEPPPEQDQNGKRWRAEFIPADHA LSFDFEFDVL  
MICAL3\_MOUSE RVVVLEKRIKFSRHNVLHLWPFPIIDLRALGAKKFFYGRFCGTLIDHSIRQLQLLLEKVALLGVESHVHNVEFPFVRLVLEPPPEQDQNGKRWRAEFIPADHA LSFDFEFDVL  
MICAL3\_HUMAN RVVVLEKRIKFSRHNVLHLWPFPIIDLRALGAKKFFYGRFCGTLIDHSIRQLQLLLEKVALLGVESHVHNVEFPFVRLVLEPPPEQDQNGKRWRAEFIPADHA LSFDFEFDVL  
MICAL\_DROME RVVVLEKRIKFSRHNVLHLWPFPIIDLRNLGAKKFFYGRFCGTLIDHSIRQLQLLLEKVALLGVESHVHNVEFPFVRLVLEPPPEQDQNGKRWRAEFIPADHA LSFDFEFDVL

\*\*\*\*\*

MICAL1\_MOUSE  $\beta 9$   $\beta 10$   $\alpha 10$   $\beta 11$   $\alpha 11$   $\beta 12$   $\beta 13$   $\alpha 12$   $\alpha 13$

220 230 240 250 260 270 280 290 300 310 320

MICAL1\_MOUSE ISAAGGKFPVEGFTIREMRGKLAIGITANFNNGRTVETQVPEISGVARVYNOKFPFQSLKKAETGIDLNIIVYYKDCIHYFVMTAKKQCLRLRIGVLRQDLSLSDTDLGKAN  
MICAL1\_HUMAN ISAAGGKFPVEGKVRBMRGKLAIGITANFNNGRTVETQVPEISGVARVYNOKFPFQSLKKAETGIDLNIIVYYKDCIHYFVMTAKKQCLRLRIGVLRQDLSLSDTDLGKAN  
MICAL2\_MOUSE IGADGRNRTLEGFRKRFRRGKLAIGITANFNNGRTVETQVPEISGVARVYNOKFPFQSLKKAETGIDLNIIVYYKDCIHYFVMTAKKQCLRLRIGVLRQDLSLSDTDLGKAN  
MICAL2\_HUMAN IGADGRNRTLEGFRKRFRRGKLAIGITANFNNGRTVETQVPEISGVARVYNOKFPFQSLKKAETGIDLNIIVYYKDCIHYFVMTAKKQCLRLRIGVLRQDLSLSDTDLGKAN  
MICAL3\_MOUSE IGADGRNRTLEGFRKRFRRGKLAIGITANFNNGRTVETQVPEISGVARVYNOKFPFQSLKKAETGIDLNIIVYYKDCIHYFVMTAKKQCLRLRIGVLRQDLSLSDTDLGKAN  
MICAL3\_HUMAN IGADGRNRTLEGFRKRFRRGKLAIGITANFNNGRTVETQVPEISGVARVYNOKFPFQSLKKAETGIDLNIIVYYKDCIHYFVMTAKKQCLRLRIGVLRQDLSLSDTDLGKAN  
MICAL\_DROME IGADGRNMLDIFRRKRFRRGKLAIGITANFNNGKTEARVPEISGVARVYNOKFPFQSLKKAETGIDLNIIVYYKDCIHYFVMTAKKQCLRLRIGVLRQDLSLSDTDLGKAN

\*\*\*\*\*

MICAL1\_MOUSE  $\alpha 14$   $\beta 14$   $\beta 15$   $\beta 16$   $\beta 17$   $\alpha 15$

330 340 350 360 370 380 390 400 410 420 430

MICAL1\_MOUSE VVPEALQRFFARAAADPNTKHLGKLEFAQDAHGRQDVVAADFDTSMRRAS SARVQKHGKARLLGLVGDCLVPEFPWFPGCVARGPLAAMDANMVKRRAEGLRGPEVL  
MICAL1\_HUMAN VVPEALQRFFARAAADPNTKHLGKLEFAQDAHGRQDVVAADFDTSMRRAS SARVQKHGKARLLGLVGDCLVPEFPWFPGCVARGPLAAMDANMVKRRAEGLRGPEVL  
MICAL2\_MOUSE VVQDNLVYARAAADPNTKHLGKLEFAINHGGRQDVVAADFDTSMYASNAALMRERRQHQGLVVALVGDGSLPEFPWFPGCVARGPLAAMDANMVKRRAEGLRGPEVL  
MICAL2\_HUMAN VVQDNLVYARAAADPNTKHLGKLEFAINHGGRQDVVAADFDTSMYASNAALVRERRQHQGLVVALVGDGSLPEFPWFPGCVARGPLAAMDANMVKRRAEGLRGPEVL  
MICAL3\_MOUSE VVQDNLVYARAAADPNTKHLGKLEFAINHYGGRQDVVAADFDTSMYASNAALVRERRQHQGLVVALVGDGSLPEFPWFPGCVARGPLAAMDANMVKRRAEGLRGPEVL  
MICAL3\_HUMAN VVQDNLVYARAAADPNTKHLGKLEFAINHYGGRQDVVAADFDTSMYASNAALVRERRQHQGLVVALVGDGSLPEFPWFPGCVARGPLAAMDANMVKRRAEGLRGPEVL  
MICAL\_DROME VVDTQKLDVYARAAADPNTKHLGKLEFAVNNHYGGRQDVVAADFDTSMFAASMSCRVIVRKHGKARLLGLVGDGSLPEFPWFPGCVARGPLAAMDANMVKRRAEGLRGPEVL

\*\*\*\*\*

MICAL1\_MOUSE  $\alpha 16$   $\eta 4$   $\eta 5$   $\eta 6$   $\beta 18$

440 450 460 470 480

MICAL1\_MOUSE ABRESVQLLSQSPENMHRNVAQGLDPAATRYPNLNLRAVTFPNQVLDVDMMDKEL  
MICAL1\_HUMAN ABRESVQLLSQSPENMHRNVAQGLDPAATRYPNLNLRAVTFPNQVLDVDMMDKEL  
MICAL2\_MOUSE ABRESVQLLSQSPENINKNFEQTLDPATRYPNLNLHCVRFPHQVRELVITIKEMD  
MICAL2\_HUMAN ABRESVQLLSQSPENINKNFEQTLDPATRYPNLNLHCVRFPHQVRELVITIKEMD  
MICAL3\_MOUSE ABRESVQLLSQSPENVSKNFSQSIDPVTTRYPNLNLNPLRPSQVRELVDTGSGE  
MICAL3\_HUMAN ABRESVQLLSQSPENVSKNFSQSIDPVTTRYPNLNLNPLRPSQVRELVDTGSGE  
MICAL\_DROME AQRESVQLLSQSPENVSKNFSQSIDPVTTRYPNLNLNPLRPSQVRELVDTGSGE
