# Supplementary material
Source: PubMed Central journal article supplement (PMC1283798)

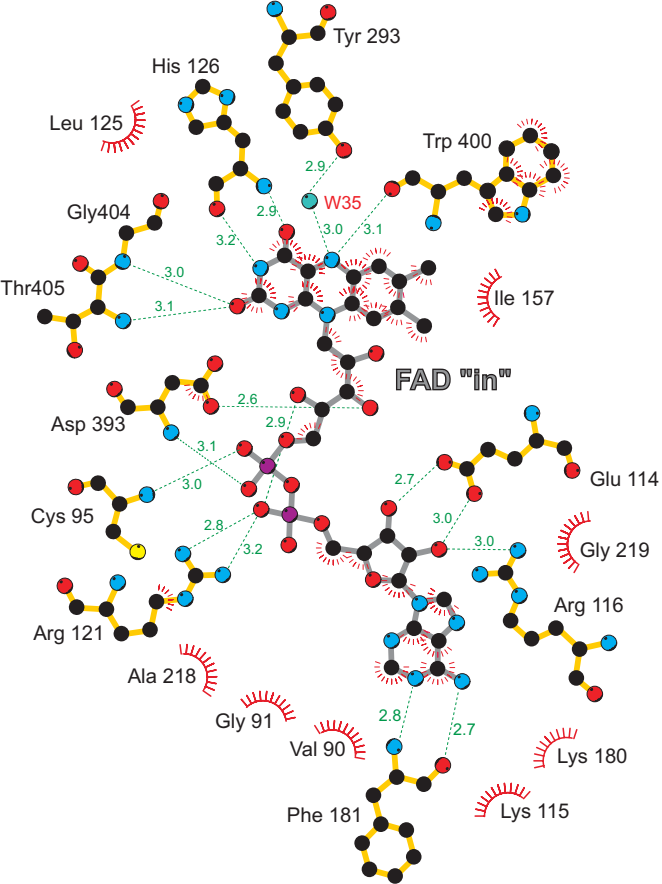

Supplement: pnas_0504997102_2.pdf [file pnas_0504997102_2.pdf]
